# Supplementary material for: Construction of unique NiCo2O4 nanowire@CoMoO4 nanoplate core/shell arrays on Ni foam for high areal capacitance supercapacitors
Source: Royal Society of Chemistry journal article supplement (doi:10.1039/c3ta14351a), 2014-01-01
Supplement: c3ta14351a.pdf [file c3ta14351a.pdf]

## Supporting information

### **Construction of unique NiCo<sub>2</sub>O<sub>4</sub> nanowire@CoMoO<sub>4</sub> nanoplate core/shell arrays on Ni foam for high areal capacitance supercapacitors**

**Daoping Cai, Bin Liu, Dandan Wang, Lingling Wang, Yuan Liu, Han Li, Yanrong Wang, Qihong Li, Taihong Wang\***

Pen-Tung Sah Institute of Micro-Nano Science and Technology,

Xiamen University, Xiamen 361000, P.R. China.

\*E-mail: [thwang@xmu.edu.cn](mailto:thwang@xmu.edu.cn)

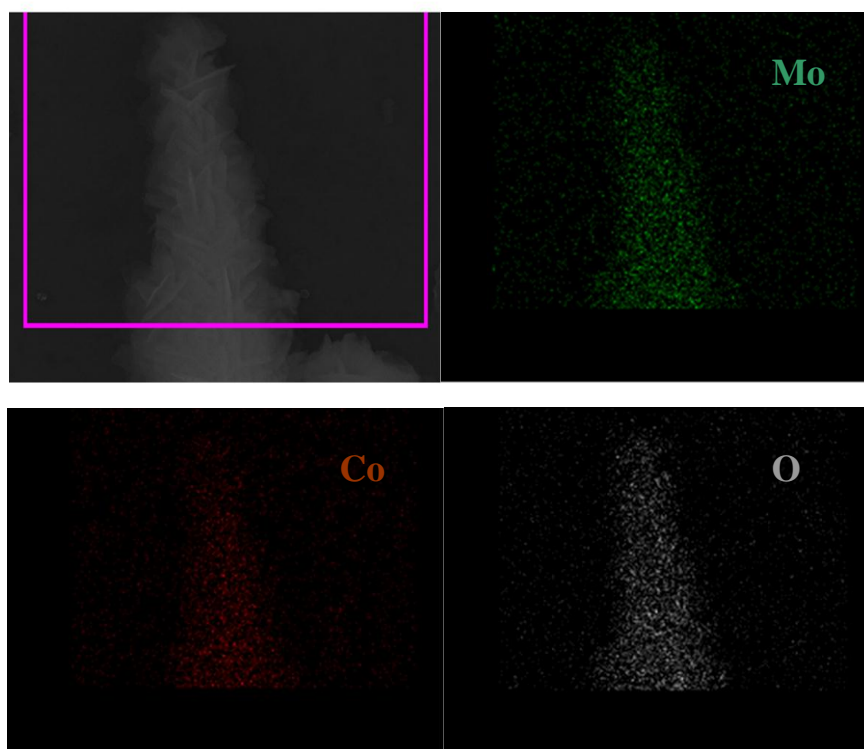

**Fig. S1.** EDS mapping of the NiCo<sub>2</sub>O<sub>4</sub>@CoMoO<sub>4</sub> (12 h) core/shell nanowire.
